# Supplementary material
Source: PubMed Central journal article supplement (PMC7655719)
Supplement: NIHMS1640167-supplement-Supplementary_material.pdf [file NIHMS1640167-supplement-Supplementary_material.pdf]

Supplementary Figure 1

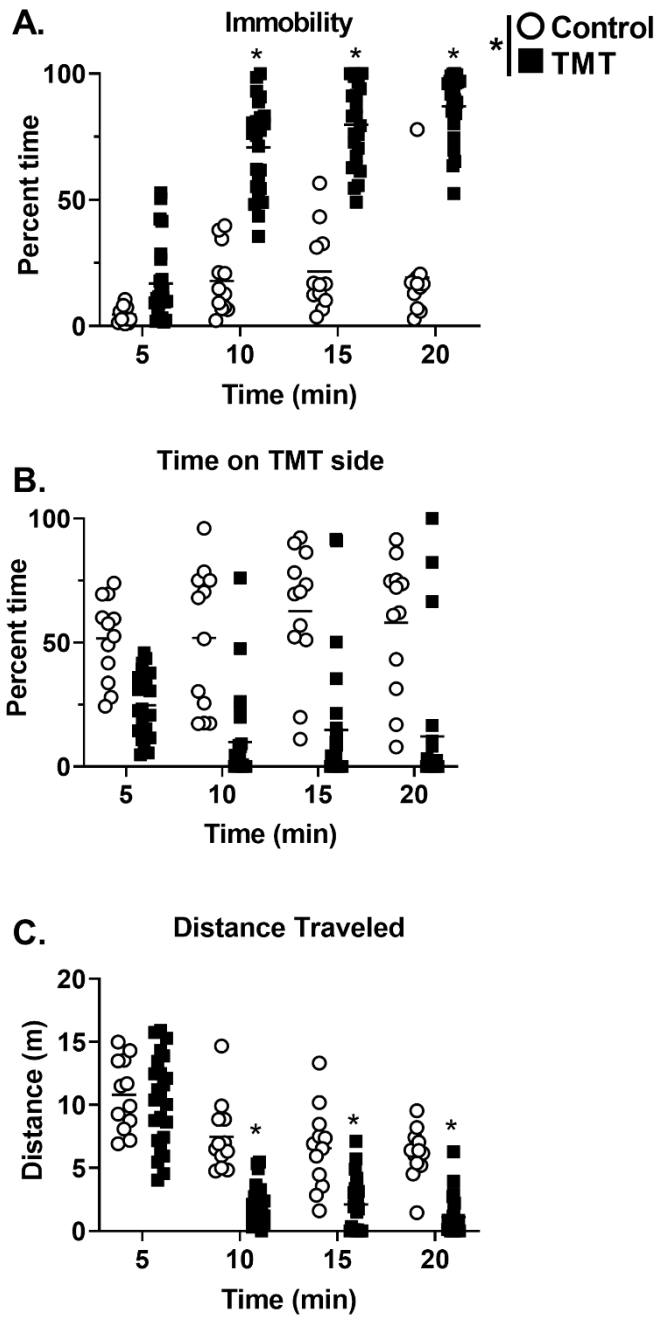

Supplemental Fig. 1 – Showing all TMT exposure behavioral measures for Experiment 1 as individual data points. \*  $p \leq 0.05$  vs. Control.

Supplementary Figure 2

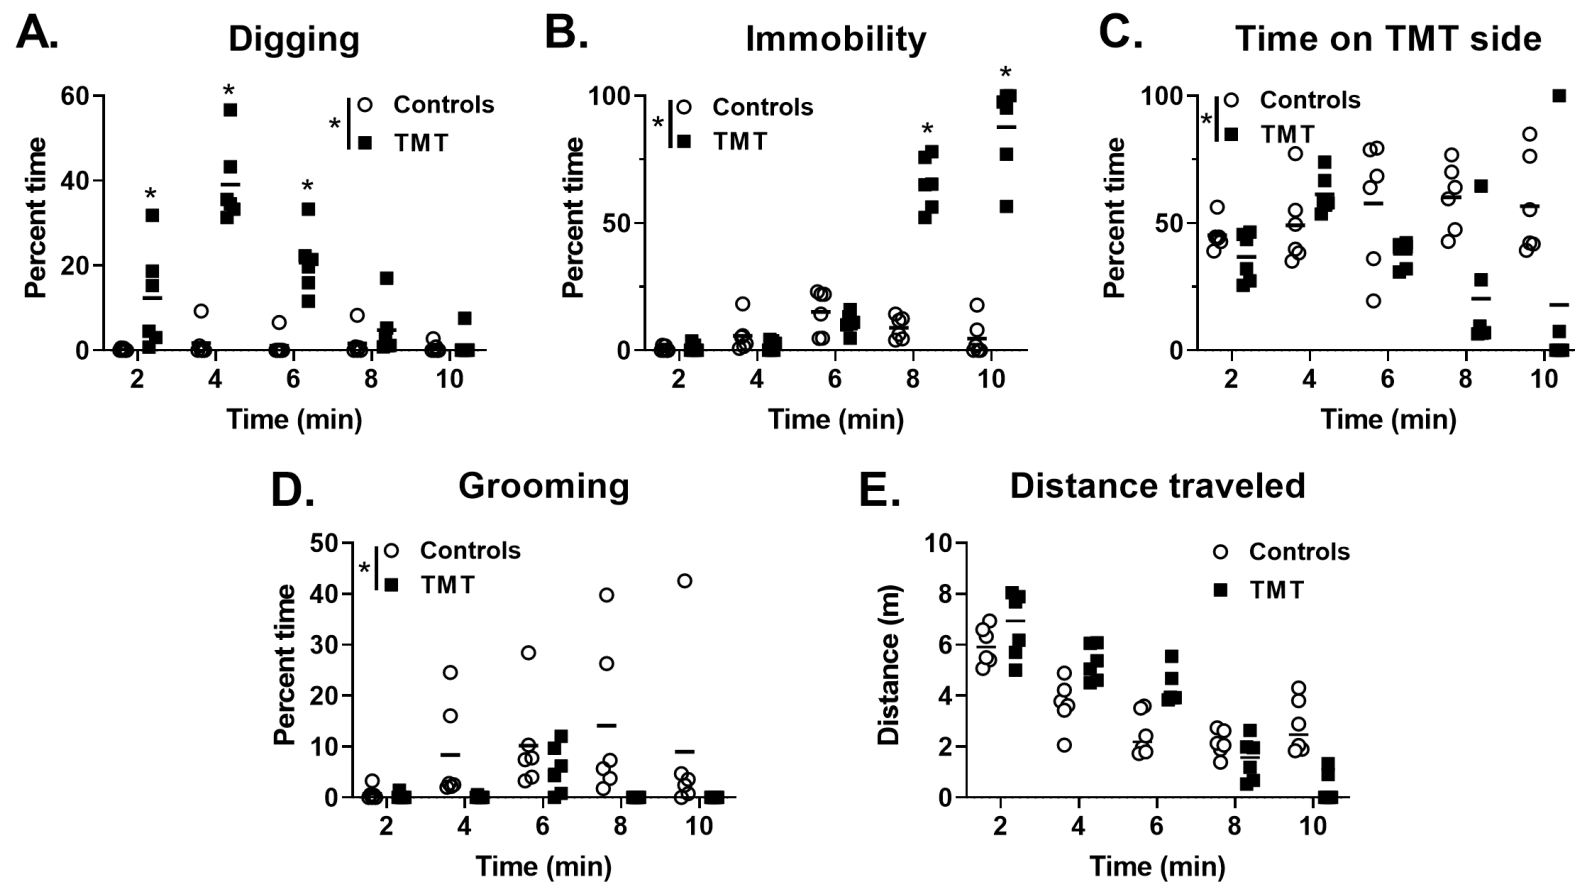

Supplemental Fig. 2 – Showing all TMT exposure behavioral measures for Experiment 2 as individual data points. \*  $p \leq 0.05$  vs. Control.

**Supplementary Table 1 – Behavioral analyses in seconds**

| TMT Exposure (10 min, in sec) |              |              |                  |            |
|-------------------------------|--------------|--------------|------------------|------------|
|                               | Digging      | Immobility   | Time on TMT side | Grooming   |
| Controls                      | 6.3 ± 3.5    | 42.0 ± 8.2   | 322.4 ± 15.6     | 50.8 ± 8.7 |
| TMT                           | 93.8 ± 15.5* | 200.3 ± 7.3* | 209.0 ± 31.6*    | 7.0 ± 0.3* |

  

| Context Re-exposure (5 min, in sec) |           |             |                  |            |
|-------------------------------------|-----------|-------------|------------------|------------|
|                                     | Digging   | Immobility  | Time on TMT side | Grooming   |
| Controls                            | 1.4 ± 1.0 | 29.0 ± 5.1  | 136.0 ± 11.3     | 30.8 ± 7.5 |
| TMT                                 | 8.3 ± 6.0 | 15.0 ± 3.7* | 185.5 ± 8.8*     | 5.8 ± 1.7* |

S1. Supplementary Table 1 – The total time (s) spent engaging in each behavior during TMT exposure and context re-exposure for Experiment 2. \*  $p \leq 0.05$  vs. Control

**Supplementary Table 2 – Gene expression 6 hours after TMT**

|                    | <i>GRM2</i> | <i>GRM3</i> | <i>GRM5</i> | <i>GRM7</i> | <i>SLC1A3</i> | <i>CRF</i>  | <i>FKBP5</i>        | <i>NR3C1</i> | <i>NR3C2</i> |
|--------------------|-------------|-------------|-------------|-------------|---------------|-------------|---------------------|--------------|--------------|
| Prelimbic Cortex   | 2.06 ± 0.78 | 0.64 ± 0.12 | 1.16 ± 0.28 | 1.76 ± 0.41 | 1.06 ± 0.46   | 2.19 ± 0.84 | n/a                 | n/a          | n/a          |
| Infralimbic Cortex | 0.75 ± 0.21 | 0.89 ± 0.26 | 0.89 ± 0.16 | 1.11 ± 0.21 | 1.04 ± 0.21   | n/a         | n/a                 | n/a          | n/a          |
| Nucleus Accumbens  | 1.30 ± 0.38 | 1.20 ± 0.11 | 0.86 ± 0.13 | 0.81 ± 0.03 | 1.06 ± 0.12   | n/a         | n/a                 | n/a          | 1.06 ± 0.14  |
| Nucleus Reuniens   | 1.42 ± 0.35 | 1.09 ± 0.08 | 1.18 ± 0.03 | 1.23 ± 0.17 | 1.29 ± 0.05   | 1.47 ± 0.35 | n/a                 | n/a          | 1.20 ± 0.07  |
| Hypothal.          | 1.59 ± 0.40 | 1.92 ± 0.53 | 1.54 ± 0.53 | 1.40 ± 0.21 | n/a           | 1.79 ± 0.50 | <b>1.47 ± 0.15*</b> | 1.26 ± 0.16  | 1.26 ± 0.12  |
| Amygdala           | 1.70 ± 0.64 | 1.30 ± 0.17 | 1.07 ± 0.17 | n/a         | n/a           | 0.89 ± 0.23 | 0.95 ± 0.11         | 1.06 ± 0.20  | 1.07 ± 0.27  |
| Dorsal Hippo.      | 1.01 ± 0.09 | 0.88 ± 0.10 | 1.46 ± 0.75 | 1.20 ± 0.14 | 1.05 ± 0.16   | 0.86 ± 0.08 | <b>1.48 ± 0.19*</b> | 0.95 ± 0.13  | 1.17 ± 0.13  |
| Ventral Hippo.     | 0.81 ± 0.15 | 0.83 ± 0.11 | 1.44 ± 0.23 | 1.11 ± 0.11 | 0.88 ± 0.13   | 1.03 ± 0.19 | 1.10 ± 0.13         | 0.75 ± 0.13  | 0.74 ± 0.10  |

S2. Supplementary Table 2 – A complete list of gene expression data as fold changes of TMT group compared to control (average=1) 6 hours after TMT exposure. \*  $p \leq 0.05$  vs. Control

**Supplementary Table 3 – Gene expression 2 days after TMT**

|                    | <i>GRM2</i> | <i>GRM3</i>         | <i>GRM5</i> | <i>GRM7</i> | <i>SLC1A3</i> | <i>CRF</i>  | <i>FKBP5</i> | <i>NR3C1</i> | <i>NR3C2</i> |
|--------------------|-------------|---------------------|-------------|-------------|---------------|-------------|--------------|--------------|--------------|
| Prelimbic Cortex   | 0.99 ± 0.21 | <b>0.49 ± 0.12*</b> | 0.59 ± 0.14 | 0.88 ± 0.27 | 1.12 ± 0.89   | 0.28 ± 0.05 | n/a          | n/a          | n/a          |
| Infralimbic Cortex | 0.79 ± 0.15 | 0.51 ± 0.11         | 0.78 ± 0.08 | 0.74 ± 0.08 | 0.76 ± 0.11   | n/a         | n/a          | n/a          | n/a          |
| Nucleus Accumbens  | 1.3 ± 0.15  | <b>1.54 ± 0.21*</b> | 1.37 ± 0.17 | 0.98 ± 0.11 | 1.08 ± 0.08   | n/a         | n/a          | n/a          | 1.26 ± 0.12  |
| Nucleus Reuniens   | 0.79 ± 0.13 | 1.00 ± 0.15         | 0.88 ± 0.09 | 1.02 ± 0.15 | 1.03 ± 0.18   | 1.16 ± 0.30 | n/a          | n/a          | 1.27 ± 0.10  |
| Hypothal.          | 1.69 ± 0.37 | 1.51 ± 0.27         | 0.98 ± 0.01 | 1.45 ± 0.22 | n/a           | 2.73 ± 0.70 | 1.25 ± 0.15  | 1.28 ± 0.20  | 1.20 ± 0.16  |
| Amygdala           | 1.70 ± 0.52 | 1.42 ± 0.25         | 1.03 ± 0.13 | n/a         | n/a           | 0.83 ± 0.12 | 0.96 ± 0.15  | 1.28 ± 0.30  | 1.00 ± 0.13  |
| Dorsal Hippo.      | 0.79 ± 0.10 | <b>0.70 ± 0.07*</b> | 2.00 ± 0.93 | 0.94 ± 0.11 | 0.79 ± 0.06   | 0.93 ± 0.16 | 0.91 ± 0.10  | 0.79 ± 0.08  | 1.27 ± 0.25  |
| Ventral Hippo.     | 1.14 ± 0.19 | 1.01 ± 0.20         | 1.21 ± 0.20 | 0.88 ± 0.11 | 0.82 ± 0.17   | 1.21 ± 0.38 | 0.88 ± 0.10  | 0.72 ± 0.08  | 0.76 ± 0.09  |

S3. Supplementary Table 3 - A complete list of gene expression data as fold changes of TMT group compared to control (average=1) 2 days after TMT exposure. Data from S2 and S3 are from Experiment 1. \*  $p \leq 0.05$  vs. Control.

**Supplementary Table 4 – Gene expression 4 weeks after TMT**

|                    | <i>GRM2</i>         | <i>GRM3</i> | <i>GRM5</i>          | <i>GRM7</i>         | <i>SLC1A3</i>       | <i>CRF</i>  | <i>FKBP5</i>        | <i>NR3C1</i> | <i>NR3C2</i>        | <i>CNR1</i>         | <i>DLG4</i>         | <i>Homer1</i>       | <i>SHANK3</i>       |
|--------------------|---------------------|-------------|----------------------|---------------------|---------------------|-------------|---------------------|--------------|---------------------|---------------------|---------------------|---------------------|---------------------|
| Prelimbic Cortex   | 1.30 ± 0.24         | 1.12 ± 0.12 | <b>12.79 ± 0.25*</b> | 0.93 ± 0.10         | <b>1.94 ± 0.23*</b> | n/a         | 1.13 ± 0.13         | n/a          | 0.86 ± 0.11         | 0.90 ± 0.13         | <b>1.58 ± 0.18*</b> | 1.24 ± 0.09         | 1.18 ± 0.15         |
| Infralimbic Cortex | <b>0.38 ± 0.11*</b> | 1.21 ± 0.24 | 1.03 ± 0.16          | 1.37 ± 0.24         | 1.17 ± 0.16         | n/a         | n/a                 | n/a          | n/a                 | 1.28 ± 0.21         | 1.14 ± 0.17         | <b>1.47 ± 0.18*</b> | 1.01 ± 0.17         |
| Nucleus Accumbens  | 0.68 ± 0.07         | 0.90 ± 0.06 | 1.04 ± 0.08          | <b>0.73 ± 0.06*</b> | <b>0.47 ± 0.06*</b> | n/a         | n/a                 | n/a          | n/a                 | n/a                 | n/a                 | n/a                 | n/a                 |
| Nucleus Reunians   | 1.09 ± 0.05         | 0.91 ± 0.12 | n/a                  | n/a                 | n/a                 | n/a         | n/a                 | 0.78 ± 0.02  | 0.99 ± 0.02         | 0.85 ± 0.14         | n/a                 | n/a                 | n/a                 |
| Hypothal.          | n/a                 | n/a         | n/a                  | n/a                 | n/a                 | 1.27 ± 0.23 | 1.38 ± 0.40         | 0.97 ± 0.14  | 1.25 ± 0.28         | n/a                 | n/a                 | n/a                 | n/a                 |
| Amygdala           | n/a                 | n/a         | n/a                  | n/a                 | n/a                 | 1.93 ± 0.46 | 0.91 ± 0.09         | 1.00 ± 0.15  | 1.23 ± 0.13         | n/a                 | n/a                 | n/a                 | n/a                 |
| Dorsal Hippo.      | 1.29 ± 0.18         | 1.12 ± 0.17 | 0.68 ± 0.16          | 1.39 ± 0.19         | 1.73 ± 0.30         | 1.03 ± 0.16 | <b>1.57 ± 0.21*</b> | 1.18 ± 0.16  | <b>1.79 ± 0.23*</b> | 0.75 ± 0.11         | 0.97 ± 0.05         | 1.10 ± 0.09         | <b>0.67 ± 0.06*</b> |
| Ventral Hippo.     | 0.92 ± 0.41         | 0.79 ± 0.17 | <b>0.60 ± 0.09*</b>  | <b>0.55 ± 0.07*</b> | 0.80 ± 0.14         | 0.61 ± 0.14 | 0.90 ± 0.27         | 1.0 ± 0.31   | 1.20 ± 0.39         | <b>0.53 ± 0.08*</b> | 1.02 ± 0.03         | <b>0.55 ± 0.07*</b> | <b>0.51 ± 0.05*</b> |

Supplementary Table 4 - A complete list of gene expression data as fold changes of TMT group compared to control (average=1) weeks after TMT exposure. Data from S4 are from Experiment 2. \* p≤0.05 vs. Control.
